# Supplementary material for: The preoperative prognostic value of the radiomics nomogram based on CT combined with machine learning in patients with intrahepatic cholangiocarcinoma
Source: PubMed Central journal article supplement (PMC8327418; doi:10.1186/s12957-021-02162-0), 2021-08-01
Supplement: 12957_2021_2162_MOESM1_ESM.pdf [file 12957_2021_2162_MOESM1_ESM.pdf]

**Supplementary table 1**

| <b>Type of feature</b>                                                                                                                              | <b>Feature name</b>                        | <b>Description</b>                                              |
|-----------------------------------------------------------------------------------------------------------------------------------------------------|--------------------------------------------|-----------------------------------------------------------------|
| Image-based parameters                                                                                                                              | minvalue                                   | Describe its minimum                                            |
|                                                                                                                                                     | meanvalue                                  | Describe its mean                                               |
|                                                                                                                                                     | stdvalue                                   | Describe its standard deviation                                 |
|                                                                                                                                                     | maxvalue                                   | Describe its maximum                                            |
| Co-occurrence matrix (GLCM): takes into account the arrangements of pairs of voxels to extract textural indices                                     | Homogeneity                                | Homogeneity of grey-level voxel pairs                           |
|                                                                                                                                                     | Energy                                     | Uniformity of grey-level voxel pairs.                           |
|                                                                                                                                                     | Correlation                                | Linear dependency of grey-levels in GLCM                        |
|                                                                                                                                                     | Contrast                                   | Local variations in the GLCM                                    |
|                                                                                                                                                     | Entropy                                    | Randomness of grey-level voxel pairs                            |
| Grey-Level Run Length Matrix (GLRLM): gives the size of homogenous runs for each grey-level                                                         | SRE (short-run emphasis)                   | Distribution of the short homogeneous runs in an image          |
|                                                                                                                                                     | LRE (long-run emphasis)                    | Distribution of the long homogeneous runs in an image           |
|                                                                                                                                                     | LGRE (low grey-level run emphasis)         | Distribution of the low grey-level runs                         |
|                                                                                                                                                     | HGRE (high grey-level run emphasis)        | Distribution of the high grey-level runs                        |
|                                                                                                                                                     | SRLGE (short-run low grey-level emphasis)  | Distribution of the short homogenous runs with low grey-levels  |
|                                                                                                                                                     | SRHGE (short-run high grey-level emphasis) | Distribution of the short homogenous runs with high grey-levels |
|                                                                                                                                                     | LRLGE (long-run low grey-level Emphasis)   | Distribution of the long homogeneous runs with low grey-levels  |
|                                                                                                                                                     | LRHGE (long-run high grey-level emphasis)  | Distribution of the long homogeneous runs with high grey-levels |
|                                                                                                                                                     | GLNU (grey-level non-uniformity)           | Non-uniformity of the grey-levels of the homogeneous runs       |
|                                                                                                                                                     | RLNU (run length non-uniformity)           | Length of the homogeneous runs                                  |
| Neighbourhood Grey-Level Different Matrix (NGLDM): corresponds to the difference of grey-level between one voxel and its 26 neighbourhoods in three | RP (run percentage)                        | Homogeneity of the homogeneous runs                             |
|                                                                                                                                                     | Coarseness                                 | Level of spatial rate of change in intensity                    |

|                                                                                                                                     |                                             |                                                                                                       |
|-------------------------------------------------------------------------------------------------------------------------------------|---------------------------------------------|-------------------------------------------------------------------------------------------------------|
| dimensions                                                                                                                          | Contrast                                    | Intensity difference between neighbouring regions                                                     |
|                                                                                                                                     | Busyness                                    | Spatial frequency of changes in intensity                                                             |
| Grey-Level Zone Length Matrix (GLZLM): provides information on the size of homogenous zones for each grey-level in three dimensions | SZE (short-zone emphasis)                   | Distribution of the short homogeneous zones in an image                                               |
|                                                                                                                                     | LZE (long-zone emphasis)                    | Distribution of the long homogeneous zones in an image                                                |
|                                                                                                                                     | LGZE (low grey-level zone emphasis)         | Distribution of the low grey-level zones                                                              |
|                                                                                                                                     | HGZE (high grey-level zone emphasis)        | Distribution of the high grey-level zones                                                             |
|                                                                                                                                     | SZLGE (short-zone low grey-level emphasis)  | Distribution of the short homogenous zones with low grey-levels                                       |
|                                                                                                                                     | SZHGE (short-zone high grey-level emphasis) | Distribution of the short homogenous zones with high grey-levels                                      |
|                                                                                                                                     | LZLGE (long-zone low grey-level emphasis)   | Distribution of the long homogeneous zones with low grey-levels                                       |
|                                                                                                                                     | LZHGE (long-zone high grey-level emphasis)  | Distribution of the long homogeneous zones with high grey-levels                                      |
|                                                                                                                                     | GLNU (grey-level non-uniformity)            | Non-uniformity of the grey-levels of the homogeneous zones                                            |
|                                                                                                                                     | ZLNU (zone length non-uniformity)           | Length of the homogeneous runs                                                                        |
| Indices from SHAPE: provides information from shape analysis                                                                        | ZP (zone percentage)                        | Homogeneity of the homogeneous zones                                                                  |
|                                                                                                                                     | Sphericity                                  | Measures how spherical a volume of interest is                                                        |
|                                                                                                                                     | Compacity                                   | Measures the degree to which the volume of interest is compact                                        |
| Indices from Histogram(HISTO): provides information derived from global histogram analysis                                          | SHAPE_Volume (mL)                           | Measures the Volume of Interest in mL                                                                 |
|                                                                                                                                     | SHAPE_Volume (# vx)                         | Measures the Volume of Interest in voxels.                                                            |
|                                                                                                                                     | Skewness                                    | Asymmetry of the grey-level distribution in the histogram.                                            |
|                                                                                                                                     | Kurtosis                                    | Reflects the shape of the grey-level distribution (peaked or flat) relative to a normal distribution. |
|                                                                                                                                     | Entropy                                     | Measures the randomness of the distribution                                                           |
|                                                                                                                                     | Energy                                      | Measures the uniformity of the distribution                                                           |

---
