# Supplementary material for: The preoperative prognostic value of the radiomics nomogram based on CT combined with machine learning in patients with intrahepatic cholangiocarcinoma
Source: PubMed Central journal article supplement (PMC8327418; doi:10.1186/s12957-021-02162-0), 2021-08-01
Supplement: 12957_2021_2162_MOESM2_ESM.pdf [file 12957_2021_2162_MOESM2_ESM.pdf]

**Table 2 Selected parameters**

| <b>Parameter</b>          | <b>Coefficient</b> |
|---------------------------|--------------------|
| PARAMS_ZSpatialResampling | -0.116560          |
| PARAMS_YSpatialResampling | 1.094233           |
| PARAMS_XSpatialResampling | 2.362806           |
| GLCM_Correlation          | 1.255790           |
| GLCM_Dissimilarity        | -0.583620          |
| GLRLM_SRLGE               | -11457.340000      |
| GLRLM_GLNU                | 0.000033           |
