# Supplementary material for: The preoperative prognostic value of the radiomics nomogram based on CT combined with machine learning in patients with intrahepatic cholangiocarcinoma
Source: PubMed Central journal article supplement (PMC8327418; doi:10.1186/s12957-021-02162-0), 2021-08-01
Supplement: 12957_2021_2162_MOESM3_ESM.pdf [file 12957_2021_2162_MOESM3_ESM.pdf]

**Table 3 The formulas for constructing the model**

| <b>Model</b>    | <b>Formula</b>                                                                                                                                                                                                 |
|-----------------|----------------------------------------------------------------------------------------------------------------------------------------------------------------------------------------------------------------|
| Radiomics score | $-0.116560PARAMS\_ZSpatialResampling+1.094233PARAMS\_YSpatialResampling+2.362806PARAMS\_XSpatialResampling+1.255790GLCM\_Correlation-0.583620GLCM\_Dissimilarity-11457.340000GLRLM\_SRLGE+0.000033GLRLM\_GLNU$ |
